# Supplementary material for: Prevalence, Virulence Potential, and Growth in Cheese of Bacillus cereus Strains Isolated from Fresh and Short-Ripened Cheeses Sold on the Italian Market
Source: MDPI journal article supplement (doi:10.3390/microorganisms11020521), 2023-02-18
Supplement: s1 [file s1]

**Table S3.** Biofilm formation by *B. cereus* strains.

| Strain | OD <sub>595</sub> (Mean ± SD) | p compared to negative control <sup>a</sup> |
|--------|-------------------------------|---------------------------------------------|
| 27     | 0.276 ± 0.068                 | < 0.0001                                    |
| 43     | 0.234 ± 0.071                 | 0.0027                                      |
| 47     | 0.218 ± 0.048                 | 0.0079                                      |
| 49     | 0.203 ± 0.028                 | 0.0242                                      |
| 50     | 0.234 ± 0.090                 | 0.0026                                      |
| 52     | 0.195 ± 0.049                 | 0.0390                                      |
| 65     | 0.215 ± 0.065                 | 0.0107                                      |
| 73     | 0.225 ± 0.013                 | 0.0051                                      |
| 75     | 0.197 ± 0.018                 | 0.0348                                      |
| 77     | 0.226 ± 0.073                 | 0.0048                                      |
| 87     | 0.205 ± 0.027                 | 0.0207                                      |
| 120    | 0.202 ± 0.078                 | 0.0255                                      |

<sup>a</sup> sterile LB.
