# Supplementary material for: Prevalence, Virulence Potential, and Growth in Cheese of Bacillus cereus Strains Isolated from Fresh and Short-Ripened Cheeses Sold on the Italian Market
Source: MDPI journal article supplement (doi:10.3390/microorganisms11020521), 2023-02-18
Supplement: s1 [file s1]

**Table S2.** Identification scores obtained by MALDI-TOF analysis on three separate colonies for each isolate

| <b>Strain</b> | <b>Identification</b> | <b>Scores</b>   |
|---------------|-----------------------|-----------------|
| 27            | <i>B. cereus</i>      | 2.24-2.22-2.02  |
| 43            | <i>B. cereus</i>      | 2.43- 2.38-2.01 |
| 47            | <i>B. cereus</i>      | 2.33-2.22-2.20  |
| 49            | <i>B. cereus</i>      | 2.19-2.07-2.23  |
| 50            | <i>B. cereus</i>      | 2.39-2.45-2.30  |
| 52            | <i>B. cereus</i>      | 2.40-2.41-2.42  |
| 65            | <i>B. cereus</i>      | 2.34-2.40-2.36  |
| 73            | <i>B. cereus</i>      | 2.49-2.38-2.33  |
| 75            | <i>B. cereus</i>      | 2.45-2.47-2.21  |
| 77            | <i>B. cereus</i>      | 2.21-2.08-2.25  |
| 87            | <i>B. cereus</i>      | 2.28-2.36-2.19  |
| 120           | <i>B. cereus</i>      | 2.20-2.35-2.36  |
