# Supplementary material for: Prevalence, Virulence Potential, and Growth in Cheese of Bacillus cereus Strains Isolated from Fresh and Short-Ripened Cheeses Sold on the Italian Market
Source: MDPI journal article supplement (doi:10.3390/microorganisms11020521), 2023-02-18
Supplement: s1 [file s1]

**Table S1.** *B. cereus* enumeration (total organisms and spores) in fresh cheeses.

| Product           | Sample code   | Total (cfu/g) | Spores (cfu/g) | Product                   | Sample code   | Total (cfu/g) | Spores (cfu/g) |
|-------------------|---------------|---------------|----------------|---------------------------|---------------|---------------|----------------|
| Burrata (C)       | 3             | <10           | <10            | Primosale (C)             | 32            | <10           | <10            |
|                   | 19            | <10           | <10            |                           | 34 (no lact.) | <10           | <10            |
|                   | 41            | <10           | <10            |                           | 48            | <10           | <10            |
|                   | 116           | <10           | <10            |                           | 57            | <10           | <10            |
| Mozzarella (C)    | 1             | <10           | <10            |                           | 87            | <b>10</b>     | <10            |
|                   | 2             | <10           | <10            |                           | 111 (pepper)  | <10           | <10            |
|                   | 29            | <10           | <10            | Primosale (G)             | 99            | <10           | <10            |
|                   | 31            | <10           | <10            |                           | 10            | <10           | <10            |
|                   | 38            | <10           | <10            |                           | 27            | <b>180</b>    | <b>170</b>     |
|                   | 46            | <10           | <10            | Robiola (C)               | 43            | <10           | <b>10</b>      |
|                   | 78            | <10           | <10            |                           | 58            | <10           | <10            |
|                   | 79            | <10           | <10            |                           | 81            | <10           | <10            |
|                   | 80 (no lact.) | <10           | <10            |                           | 95            | <10           | <10            |
|                   | 97            | <10           | <10            | Robiola (G)               | 26            | <10           | <10            |
|                   | 102           | <10           | <10            |                           | 124           | <10           | <10            |
|                   | 119           | <10           | <10            | Squacquerone (C)          | 20            | <10           | <10            |
|                   | 121           | <10           | <10            |                           | 45            | <10           | <10            |
| Mozzarella (B)    | 42            | <10           | <10            |                           | 59            | <10           | <10            |
| Stracciatella (C) | 23            | <10           | <10            |                           | 60            | <10           | <10            |
|                   | 49            | <10           | <b>10</b>      | Other fresh cheese (G)    | 92            | <10           | <10            |
|                   | 86            | <10           | <10            | Caciotta (C)              | 44            | <10           | <10            |
| Caprino (C)       | 110           | <10           | <10            |                           | 96            | <10           | <10            |
|                   | 25            | <10           | <10            |                           | 100           | <10           | <10            |
|                   | 50            | <10           | <b>30</b>      | Monte Veronese (C)        | 98            | <10           | <10            |
|                   | 72            | <10           | <10            | Pecorino (S)              | 113           | <10           | <10            |
|                   | 73            | <10           | <b>20</b>      | Quartirolo (C)            | 52            | <10           | <b>20</b>      |
| Caprino (G)       | 117           | <10           | <10            | Taleggio (C)              | 112           | <10           | <10            |
|                   | 17 (no lact.) | <10           | <10            | Tomino (C)                | 11            | <10           | <10            |
|                   | 74            | <10           | <10            |                           | 101           | <10           | <10            |
|                   | 120           | <b>10</b>     | <10            | Other short ripened (C)   | 75            | <10           | <b>10</b>      |
| Cottage (C)       | 21            | <10           | <10            | Other short ripened (C-G) | 76            | <10           | <10            |
|                   | 37            | <10           | <10            | Brie (C)                  | 12            | <10           | <10            |
|                   | 88            | <10           | <10            |                           | 35            | <10           | <10            |
|                   | 115           | <10           | <10            |                           | 93            | <10           | <10            |
| Crescenza (C)     | 6             | <10           | <10            |                           | 94            | <10           | <10            |
|                   | 7 (no lact.)  | <10           | <10            | Camembert (C)             | 108           | <10           | <10            |
|                   | 69            | <10           | <10            | Camembert (G)             | 15            | <10           | <10            |
|                   | 70            | <10           | <10            | Camembert (B)             | 109           | <10           | <10            |

|                |                |     |           |                         |     |     |     |
|----------------|----------------|-----|-----------|-------------------------|-----|-----|-----|
|                | 85             | <10 | <10       |                         | 13  | <10 | <10 |
|                | 8              | <10 | <10       |                         | 14  | <10 | <10 |
|                | 9 (no lact.)   | <10 | <10       | Other mould ripened (C) | 103 | <10 | <10 |
|                | 22             | <10 | <10       |                         | 114 | <10 | <10 |
|                | 28             | <10 | <10       | Other mould ripened (G) | 16  | <10 | <10 |
|                | 47             | <10 | <b>10</b> |                         | 77  | <10 | 20  |
|                | 61             | <10 | <10       |                         | 4   | <10 | <10 |
|                | 62             | <10 | <10       |                         | 5   | <10 | <10 |
|                | 63             | <10 | <10       |                         | 30  | <10 | <10 |
| Stracchino (C) | 64             | <10 | <10       |                         | 33  | <10 | <10 |
|                | 65             | <10 | <b>10</b> |                         | 39  | <10 | <10 |
|                | 66             | <10 | <10       |                         | 53  | <10 | <10 |
|                | 67             | <10 | <10       | Ricotta (C)             | 54  | <10 | <10 |
|                | 68             | <10 | <10       |                         | 55  | <10 | <10 |
|                | 71             | <10 | <10       |                         | 56  | <10 | <10 |
|                | 82             | <10 | <10       |                         | 89  | <10 | <10 |
|                | 83             | <10 | <10       |                         | 90  | <10 | <10 |
|                | 84             | <10 | <10       |                         | 104 | <10 | <10 |
|                | 105 (no lact.) | <10 | <10       |                         | 123 | <10 | <10 |
|                | 118            | <10 | <10       | Ricotta (S)             | 18  | <10 | <10 |
| Feta (S-G)     | 24             | <10 | <10       | Ricotta (G)             | 91  | <10 | <10 |
|                | 36             | <10 | <10       |                         | 40  | <10 | <10 |
|                | 107            | <10 | <10       | Mascarpone (C)          | 122 | <10 | <10 |

C=cheese made by Cow milk; B=Buffalo milk; S=Sheep milk; G=Goat milk. No lact.: cheese produced assuring the absence of residual lactose. <10 CFU/g indicates bacterial counts below the limit of quantification. Detectable load of presumptive *B. cereus* were marked in bold.
