# Supplementary figures and images for: Prevalence, Virulence Potential, and Growth in Cheese of Bacillus cereus Strains Isolated from Fresh and Short-Ripened Cheeses Sold on the Italian Market
Source: MDPI journal article supplement (doi:10.3390/microorganisms11020521), 2023-02-18

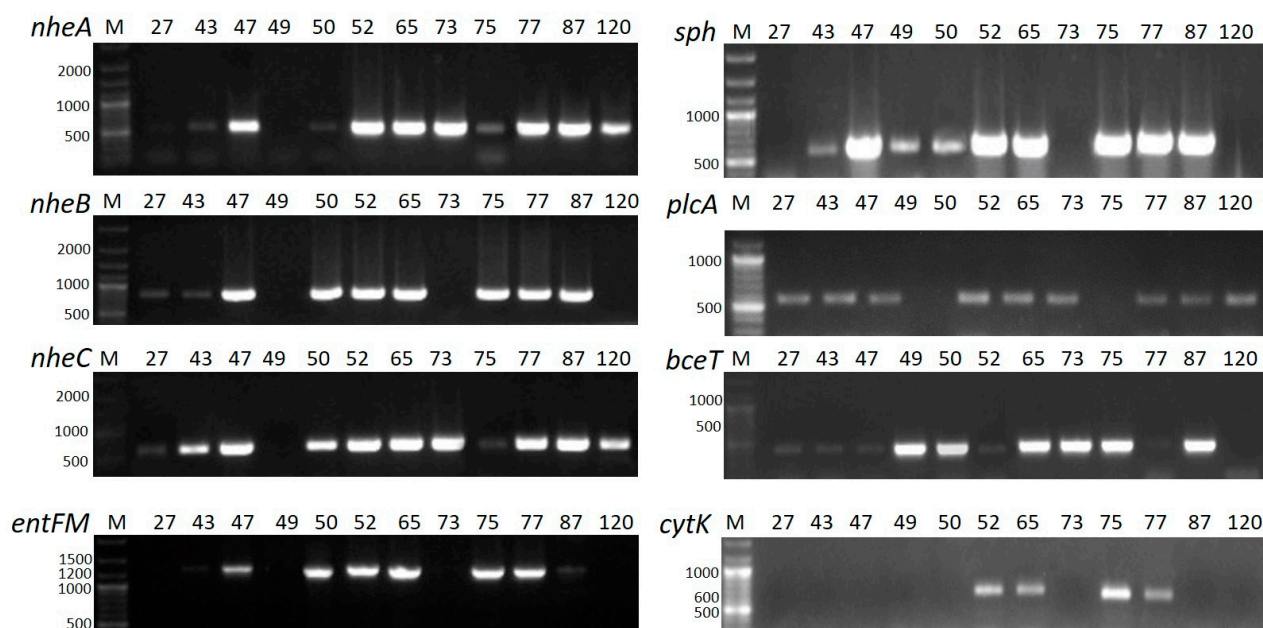

**Figure S1.** Amplification profiles of toxin-encoding genes.

Supplement: s1 [file s1]
